# Supplementary material for: Metabolic and energetic benefits of microRNA-22 inhibition
Source: PubMed Central journal article supplement — BMJ Open Diabetes Res Care. 2020 Oct 1;8(1):e001478. doi: 10.1136/bmjdrc-2020-001478 (PMC7534675; doi:10.1136/bmjdrc-2020-001478), 2020-10-01

**Supplementary Figure 1: Body composition by NMR analysis at week 12 of treatment (27 weeks of age) in mice receiving saline injections (black columns) or the APT-110 miR-22-3p antagomir (brown columns).**

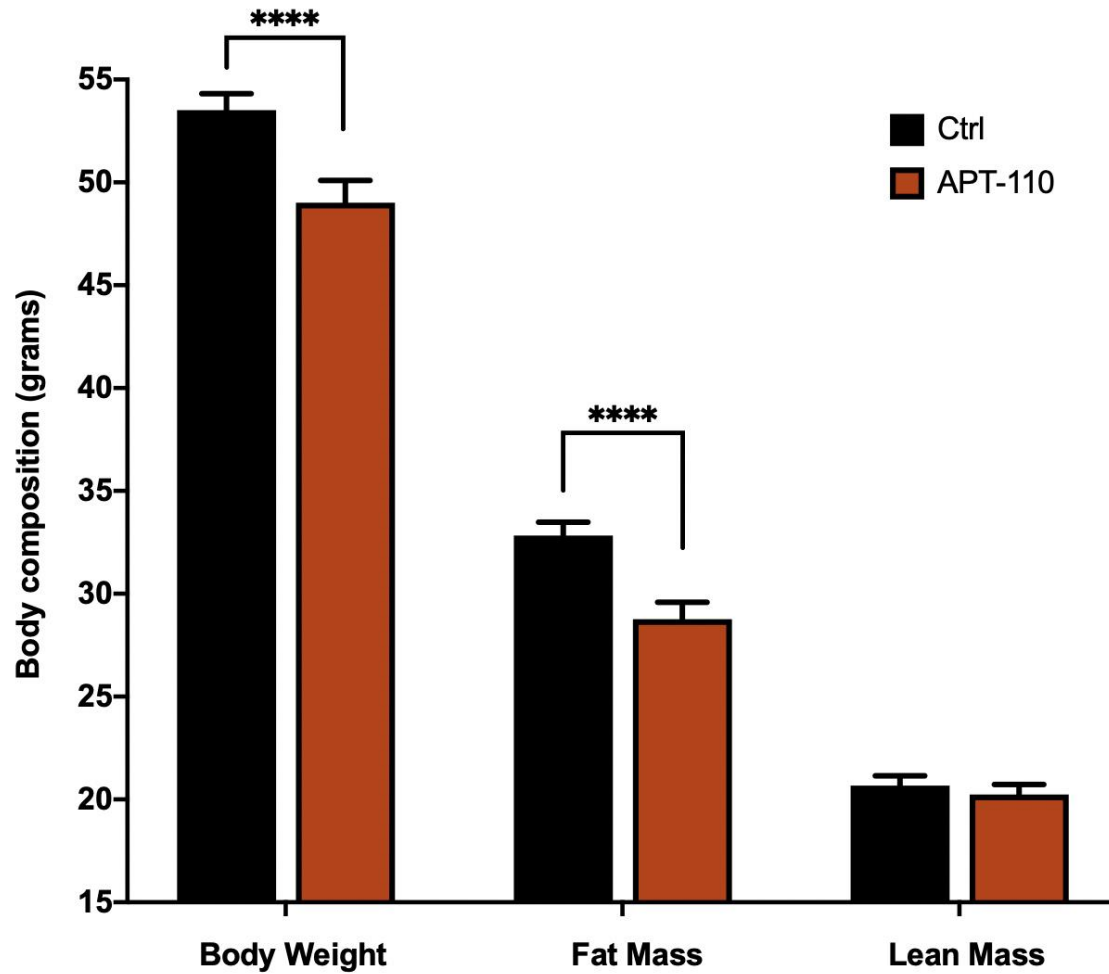

\*\*\*\* :  $p \leq 0.0001$

**Supplementary Figure 2: Fasting Plasma Insulin/Glucose ratio in mice receiving saline injections (black circles) or the APT-110 miR-22-3p inhibitor (brown squares) at baseline, in the middle and at the end of 12 weeks of treatment.**

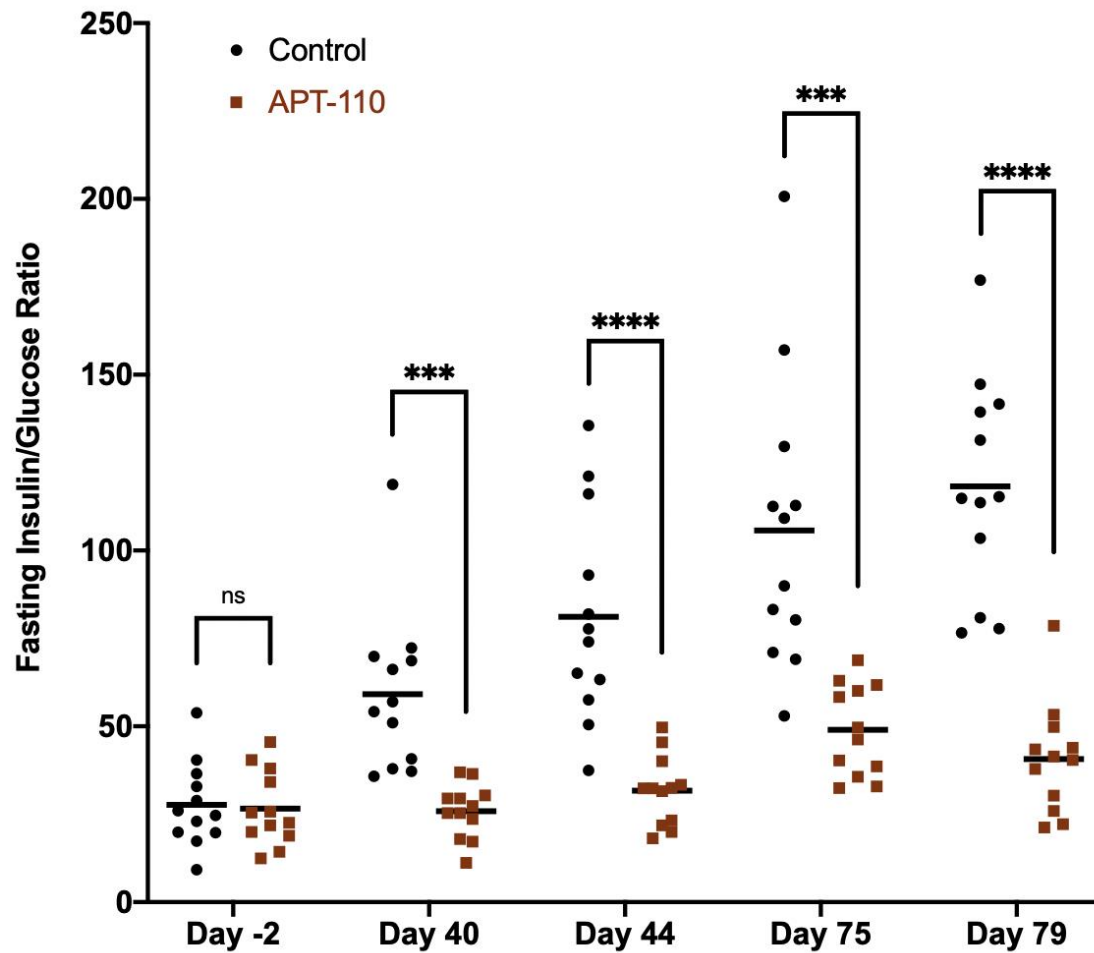

\*\*\* :  $p = 0.0001$ ; \*\*\*\* :  $p \leq 0.0001$



**Supplementary Figure 3B: RNA-Seq Data Pathway Enrichment Analysis in liver samples.** Pathway names are indicated on the top of each Mean-Average (MA) plot. In each plot, pathway genes are shown as filled orange circles. All other non-pathway genes from the RNAseq study are shown as tan, open circles (background).

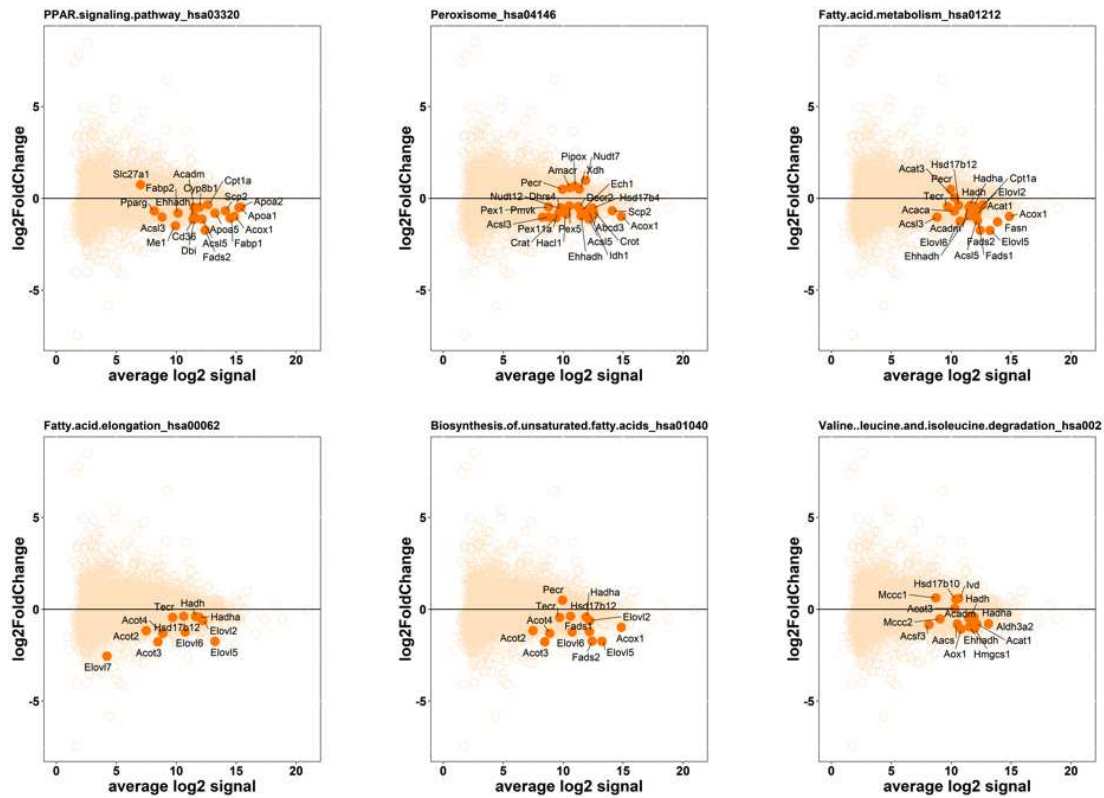

### Supplementary Figure 3C: RNA-Seq Data Pathway Enrichment Analysis in inguinal and liver samples

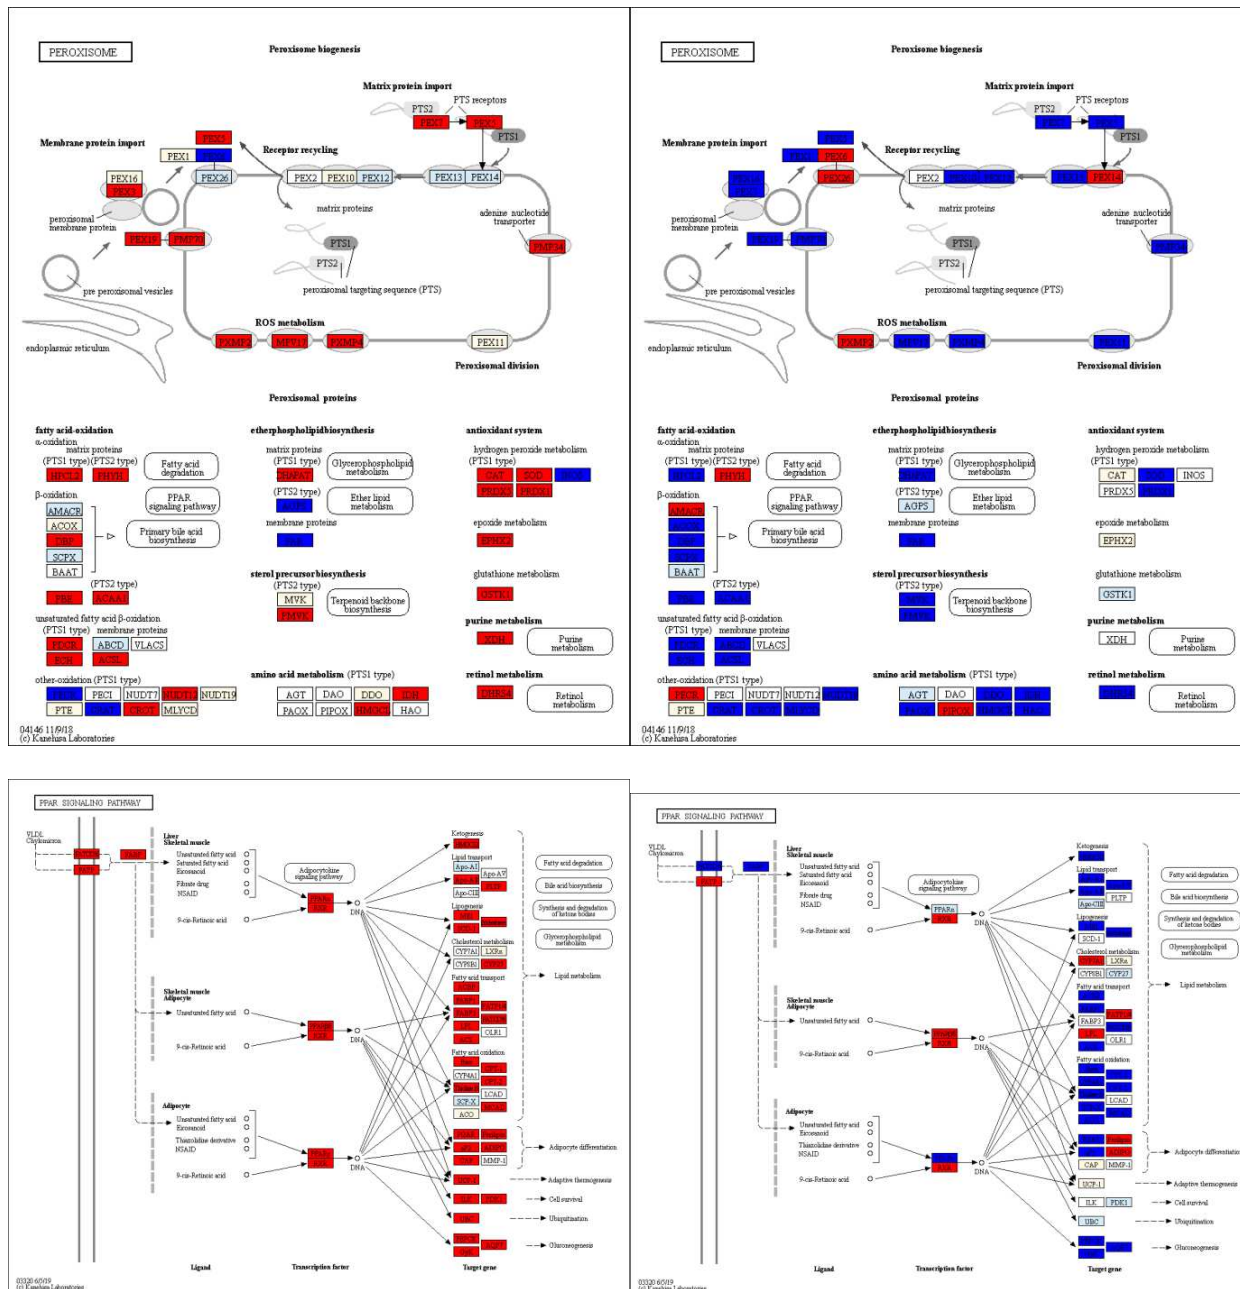

Differentially expressed genes from fat (nominal  $p < 0.01$ ) and liver (nominal  $p < 0.001$ ) RNA sequencing data were overlaid onto KEGG pathways via the KEGG pathway mapping tool ([https://www.genome.jp/kegg/tool/map\\_pathway3.html](https://www.genome.jp/kegg/tool/map_pathway3.html)). Up-regulated genes ( $\log_{2}FC \geq 0.1$ ) are colored in red and down-regulated genes ( $\log_{2}FC \leq -0.1$ ) are colored in blue.

**Supplementary Figure 3D: RNA-Seq Data Pathways analysis of liver samples of mice treated with the APT-110 miR-22-3p inhibitor (pathways with adjusted P-value (FDR)  $\leq 5\%$ ).**

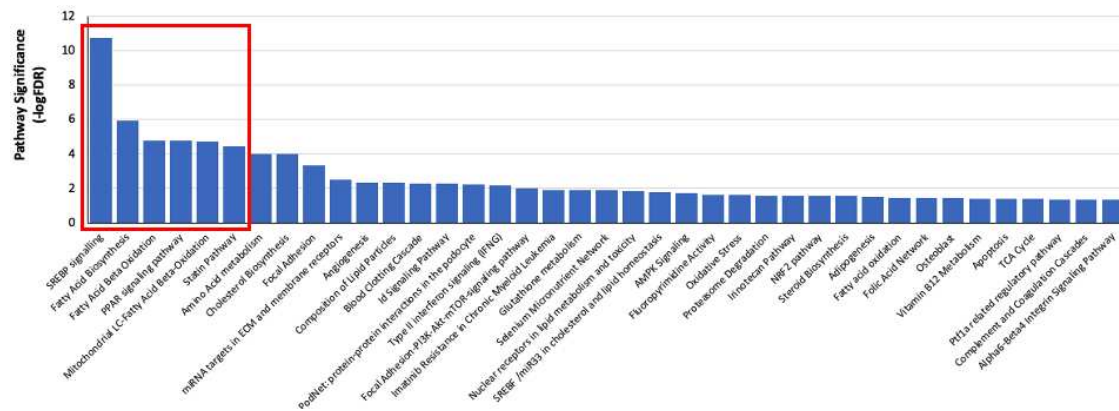

**Supplementary Figure 4: miR-22-3p target genes involved in lipid oxidation, mitochondrial functions, thermogenesis, glucose metabolism, adipocyte differentiation, inflammation and anti-oxidation.**

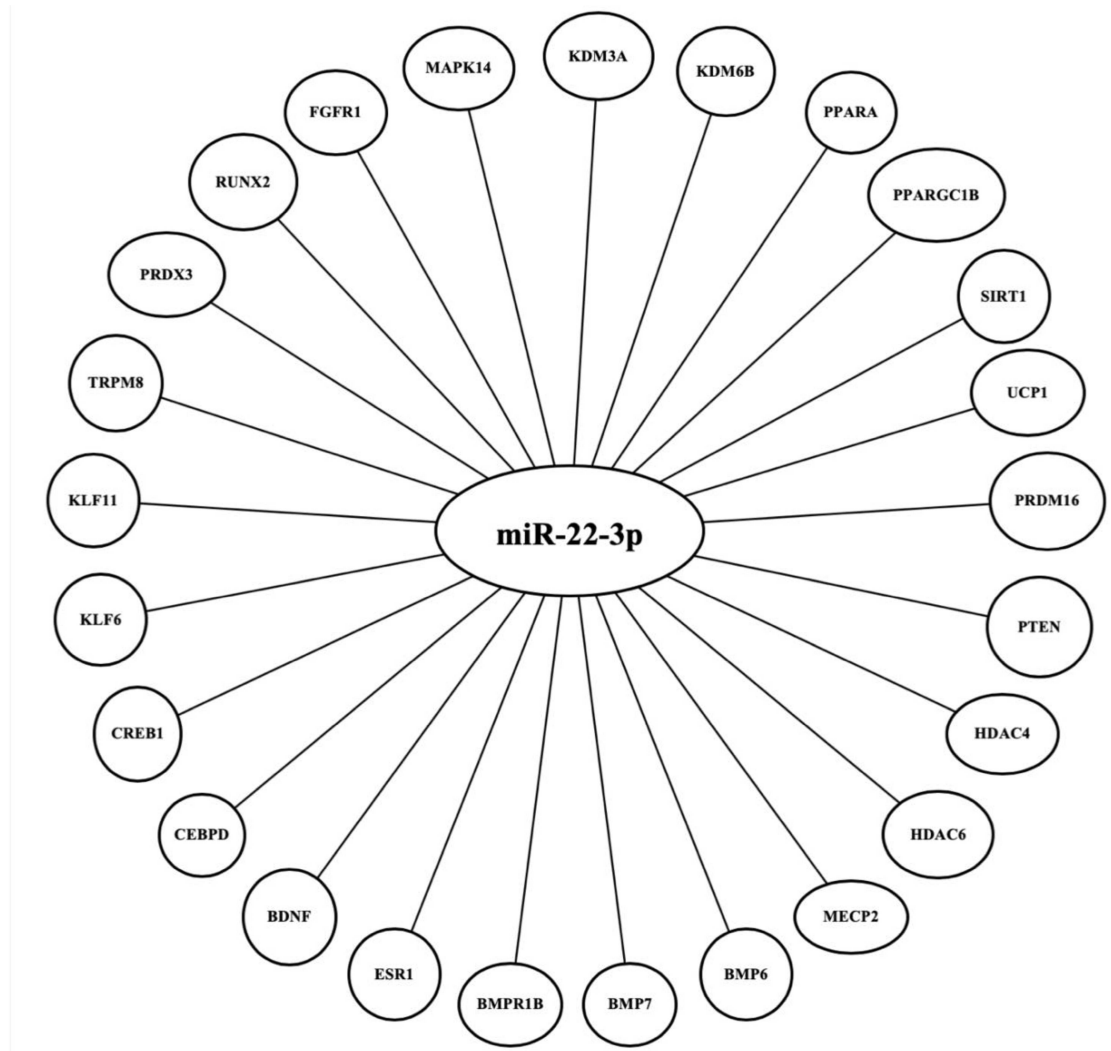

Supplement: bmjdrc-2020-001478supp001.pdf [file bmjdrc-2020-001478supp001.pdf]
