# Supplementary material for: Metabolic and energetic benefits of microRNA-22 inhibition
Source: PubMed Central journal article supplement — BMJ Open Diabetes Res Care. 2020 Oct 1;8(1):e001478. doi: 10.1136/bmjdrc-2020-001478 (PMC7534675; doi:10.1136/bmjdrc-2020-001478), 2020-10-01
Supplement: bmjdrc-2020-001478supp002.pdf [file bmjdrc-2020-001478supp002.pdf]

**Supplementary Table 1: Combinatorial in silico analysis of the miR-22-3p target genes displayed on Supplemental Figure 4 using metaMIR**  
(<http://rna.informatik.uni-freiburg.de/metaMIR/>).

| miRNA             | Final Score | Positive Combination                                                                  | Positive Score | Positive Group |
|-------------------|-------------|---------------------------------------------------------------------------------------|----------------|----------------|
| hsa-miR-22-3p     | 5.67        | BDNF,CREB1,ESR1,HDAC4,HDAC6,KDM3A,KDM6B,KLF6,MAPK14,MECP2,PPARA,PPARGC1B,PRDM16,RUNX2 | 7.145          | 14             |
| hsa-miR-181a-2-3p | 5.18        | BDNF,BMP7,CREB1,ESR1,FGFR1,HDAC4,KDM3A,KLF6,MAPK14,MECP2,PPARA,PPARGC1B,PTEN,RUNX2    | 7.371          | 14             |
| hsa-miR-200c-3p   | 4.86        | BDNF,BMPR1B,CREB1,ESR1,HDAC4,KLF6,MAPK14,PPARA,PRDM16,PRDX3,PTEN,RUNX2                | 5.768          | 12             |
| hsa-miR-200b-3p   | 4.85        | BDNF,BMPR1B,CREB1,HDAC4,KLF6,MAPK14,PPARA,PPARGC1B,PRDM16,PTEN,TRPM8                  | 4.854          | 11             |
| hsa-miR-1470      | 4.77        | CREB1,FGFR1,HDAC4,KDM6B,KLF6,MAPK14,MECP2,PPARA,PPARGC1B,PTEN,RUNX2                   | 4.769          | 11             |
| hsa-miR-4445-3p   | 4.77        | BDNF,BMP7,ESR1,HDAC4,MAPK14,PPARA,PPARGC1B                                            | 4.768          | 7              |
| hsa-miR-5001-3p   | 4.69        | BMPR1B,ESR1,FGFR1,HDAC4,KLF6,MAPK14,MECP2,PPARA,PRDM16,PTEN,RUNX2,TRPM8               | 4.695          | 12             |
| hsa-miR-101-3p    | 4.68        | BMPR1B,CREB1,ESR1,KDM3A,KLF6,MECP2,PPARGC1B,PRDM16,PTEN,SIRT1,TRPM8                   | 5.408          | 11             |
| hsa-miR-10b-5p    | 4.67        | BDNF,BMPR1B,CREB1,ESR1,HDAC4,KDM3A,PPARA,PPARGC1B,PRDM16,PTEN                         | 4.692          | 10             |
| hsa-miR-7855-5p   | 4.64        | ESR1,HDAC4,KLF11,MAPK14,PPARA,PRDM16,PTEN,TRPM8                                       | 4.639          | 8              |
| hsa-miR-1468-3p   | 4.58        | ESR1,FGFR1,HDAC4,KLF6,MECP2,PPARA,PPARGC1B,PRDM16,PTEN,TRPM8                          | 4.576          | 10             |
| hsa-miR-7110-5p   | 4.54        | CREB1,FGFR1,KDM6B,KLF6,MECP2,PPARA,PPARGC1B,PRDM16,PTEN,RUNX2,TRPM8                   | 5.283          | 11             |
| hsa-miR-302a-3p   | 4.49        | CREB1,ESR1,FGFR1,HDAC4,KDM6B,MECP2,PPARA,PPARGC1B,PRDM16,PTEN,RUNX2                   | 4.489          | 11             |
| hsa-miR-4801      | 4.47        | BDNF,BMPR1B,CREB1,KDM3A,KLF6,MAPK14,MECP2,PPARGC1B,PTEN,RUNX2,TRPM8                   | 4.473          | 11             |
| hsa-miR-941       | 4.37        | CREB1,HDAC4,KDM6B,KLF6,MECP2,PPARGC1B,PRDM16                                          | 4.396          | 7              |
| hsa-miR-6081      | 4.26        | CEBPD,FGFR1,HDAC4,KLF6,MAPK14,MECP2,PPARA,PPARGC1B,PTEN,RUNX2                         | 4.275          | 10             |
| hsa-miR-381-3p    | 4.26        | BDNF,BMPR1B,CREB1,ESR1,HDAC4,KLF6,MAPK14,MECP2,PPARGC1B,RUNX2,TRPM8                   | 4.267          | 11             |
| hsa-miR-5699-5p   | 4.22        | BMP7,CREB1,HDAC4,KLF6,MAPK14,MECP2,PPARGC1B,RUNX2                                     | 4.304          | 8              |
| hsa-miR-30e-5p    | 4.21        | BDNF,BMP7,CREB1,HDAC4,KDM3A,PPARA,PPARGC1B,PRDM16,PTEN,RUNX2                          | 4.212          | 10             |
| hsa-miR-300       | 4.19        | BDNF,BMPR1B,CREB1,ESR1,HDAC4,KLF6,MAPK14,MECP2,PPARGC1B,PRDX3,PTEN                    | 4.194          | 11             |
| hsa-miR-3649      | 4.1         | BDNF,ESR1,FGFR1,HDAC4,KDM6B,MECP2,PPARA,PPARGC1B,RUNX2                                | 4.098          | 9              |
| hsa-miR-4694-3p   | 4.09        | BMP6,CREB1,ESR1,HDAC4,KLF6,MAPK14,MECP2,PRDM16,PTEN,RUNX2,TRPM8                       | 4.087          | 11             |
| hsa-miR-6826-5p   | 4.03        | ESR1,HDAC4,KLF11,PPARA,PTEN,TRPM8                                                     | 4.051          | 6              |
